# Supplementary material
Source: PubMed Central journal article supplement (PMC3807493)
Supplement: JB.00779-13_zjb999092862so1.pdf [file JB.00779-13_zjb999092862so1.pdf]

Supplementary Table 1. Oligonucleotides used in this study

| Oligonucleotide | Sequence (5'-3')                                                 | Relevant description                                                                                |
|-----------------|------------------------------------------------------------------|-----------------------------------------------------------------------------------------------------|
| BAP3247         | GACTTTGTCGACTTTGATGCCGTTTATGGA                                   | <i>gata</i> internal forward primer for mutagenesis                                                 |
| BAP3248         | GGTTTTGTCGACCGAGCTAAGCGATATCTTCTG                                | <i>gata</i> internal reverse primer for mutagenesis                                                 |
| BAP3727         | AATTACGGATCCGGACGGATCAAATGGAACAGTT                               | <i>gctC</i> flanking forward primer for <i>gctC</i> and <i>hptE</i> expression, contains BamHI site |
| BAP3330         | GTTTAGTGATAGGTGCGACGAAATAGTTTCTATTGCC                            | <i>hptE</i> flanking reverse primer for <i>gctC</i> and <i>hptE</i> expression, contains Sall site  |
| BAP5358         | GTTTCGATATCGCGAAACGATCCTCATCCTG                                  | For amplification of pAL99 minus <i>aph3</i> (Kan <sup>R</sup> ), contains an EcoRV site            |
| BAP5359         | CCGTGATATCGCTGAAGAGCTTGGCGGC                                     | For amplification of pAL99 minus <i>aph3</i> (Kan <sup>R</sup> ), contains an EcoRV site            |
| BAP5360         | CGAAGATATCAGACATTATTTGCCGACTACC                                  | Amplification of <i>aadA</i> (Spec <sup>R</sup> ) from pUA826, contains an EcoRV site               |
| BAP5361         | AATGGATATCGCGTATGCGCTCACGCAAC                                    | Amplification of <i>aadA</i> (Spec <sup>R</sup> ) from pUA826, contains an EcoRV site               |
| BAP5477         | GGGACAGTCGACCAAGTGTAGGACTATTGGAATGG                              | <i>gatF</i> flanking forward primer for <i>gatF</i> expression, contains Sall site                  |
| BAP5478         | GGTTGAGTCGACTAGCTCATAACGACATCCC                                  | <i>gatF</i> flanking reverse primer for <i>gatF</i> expression, contains Sall site                  |
| BAP5752         | TTATCCAAGCTTATAAATATGAATCTGTATTGTGAG                             | <i>gatG</i> flanking forward primer for <i>gatG</i> expression, contains HinDIII site               |
| BAP5753         | CTCCTTAAGCTTTTGAAGAAATCAGCACTATACTC                              | <i>gatG</i> flanking reverse primer for <i>gatG</i> expression, contains HinDIII site               |
| BAP5757         | TTATTTTCAGCTGTGTCGTTATGAGCTATTGGATC                              | <i>natB</i> flanking forward primer for <i>natB</i> expression, contains PvuII site                 |
| BAP5758         | CAACCACCCGGGGTCTAGCATAAACATCATCAG                                | <i>natB</i> flanking reverse primer for <i>natB</i> expression, contains SmaI site                  |
| BAP6796         | GGCTTACGCGTCGATAGCTAGACTGGG                                      | <i>aph3</i> (Kan <sup>R</sup> ) flanking forward primer, contains MluI site                         |
| BAP6797         | TTGGGACGCGTTTGGTCGGTCATTTCCG                                     | <i>aph3</i> (Kan <sup>R</sup> ) flanking reverse primer, contains MluI site                         |
| BAP6851         | AAAAAAGCTTATAATTATCCTTAACATACATCCTAG<br>TGCGCCAGATAGGGTG         | TargetTron IBS primer specific for <i>natB</i>                                                      |
| BAP6852         | CAGATTGTACAAATGTGGTGATAACAGATAAGTCAT<br>CCTAAATAACTTACCTTTCTTTGT | TargetTron EBS1d primer specific for <i>natB</i>                                                    |
| BAP6853         | TGAACGCAAGTTTCTAATTTGATTATGTTTCGATAG<br>AGGAAAAGTGCT             | TargetTron EBS2 primer specific for <i>natB</i>                                                     |
| BAP6854         | AAAAAAGCTTATAATTATCCTTAATATTCAATATCGT<br>GCGCCCAGATAGGGTG        | TargetTron IBS primer specific for <i>gatG</i>                                                      |
| BAP6855         | CAGATTGTACAAATGTGGTGATAACAGATAAGTCAA<br>TATCCTTAACTTACCTTTCTTTGT | TargetTron EBS1d primer specific for <i>gatG</i>                                                    |
| BAP6856         | TGAACGCAAGTTTCTAATTTGCGTTAATATCCGATA<br>GAGAAAAGTGCT             | TargetTron EBS2 primer specific for <i>gatG</i>                                                     |
| BAP6864         | CAGATTGTACAAATGTGGTGATAACAGATAAGTCCA<br>CATATTTAACTTACCTTTCTTTGT | TargetTron EBS1d primer specific for <i>gatF</i>                                                    |
| BAP6865         | TGAACGCAAGTTTCTAATTTGCGATTAGCGCTCGATA<br>GAGAAAAGTGCT            | TargetTron EBS2 primer specific for <i>gatF</i>                                                     |
| BAP6866         | AAAAAAGCTTATAATTATCCTTAAGCAGCTCCCAAG<br>TGCGCCAGATAGGGTG         | TargetTron IBS primer specific for <i>gatF</i>                                                      |

|               |                                  |                                                           |
|---------------|----------------------------------|-----------------------------------------------------------|
| BAP7134       | CCTTGATATCGTGATTCTAAAGTATCCGG    | <i>tetM</i> flanking forward primer, contains EcoRV site. |
| BAP7135       | TAACGATATCCTCCTTTACACTTTAATCAAAT | <i>tetM</i> flanking reverse primer, contains EcoRV site. |
| EBS Universal | CGAAATTAGAAACTTGC GTTCAGTAAAC    | Targetron Universal primer for retargeting intron.        |

---

Supplementary Table 2.

**Negative ion CE-ES-MS data and proposed compositions of O-deacylated LPS from the *P.multocida* Australian field isolates.**

| Strain name | Observed Ions( <i>m/z</i> ) |                      | Mol Mass(Da) <sup>a</sup> |            | Proposed Composition                    |
|-------------|-----------------------------|----------------------|---------------------------|------------|-----------------------------------------|
|             | (M-3H) <sup>3-</sup>        | (M-4H) <sup>4-</sup> | Observed                  | Calculated |                                         |
| PM1         | 984.0                       | -                    | 2955.0                    | 2954.6     | 5Hex,4Hep,Kdo-P,PEtn,LipidA-OH          |
|             | 1025.0                      | -                    | 3078.0                    | 3077.7     | 5Hex,4Hep,Kdo-P,2PEtn,LipidA-OH         |
|             | 1038.0                      | -                    | 3117.0                    | 3116.8     | 6Hex,4Hep,Kdo-P,PEtn,LipidA-OH          |
|             | 1079.0                      | -                    | 3240.0                    | 3239.8     | 6Hex,4Hep,Kdo-P,2PEtn,LipidA-OH         |
|             | 1106.0                      | -                    | 3321.0                    | 3320.0     | HexNAc,6Hex,4Hep,Kdo-P,PEtn,LipidA-OH   |
|             | 1146.5                      | 860.0                | 3442.5                    | 3443.0     | HexNAc,6Hex,4Hep,Kdo-P,2PEtn,LipidA-OH  |
| PM3         | -                           | 1315                 | 2632.0                    | 2630.3     | 3Hex,4Hep,Kdo-P,PEtn,LipidA-OH          |
|             | 918.0                       | 1376.5               | 2756.0                    | 2753.3     | 3Hex,4Hep,Kdo-P,2PEtn,LipidA-OH         |
|             | 972.0                       | 1458.0               | 2918.5                    | 2915.5     | 4Hex,4Hep,Kdo-P,2PEtn,LipidA-OH         |
|             | 1013.0                      | -                    | 3042.0                    | 3038.5     | 4Hex,4Hep,Kdo-P,3PEtn,LipidA-OH         |
| PM8         | 822.0                       | -                    | 2469.0                    | 2468.2     | 2Hex,4Hep,Kdo-P,PEtn,LipidA-OH          |
|             | 863.0                       | -                    | 2592.0                    | 2591.2     | 2Hex,4Hep,Kdo-P,2PEtn,LipidA-OH         |
|             | 876.0                       | -                    | 2631.0                    | 2630.3     | 3Hex,4Hep,Kdo-P,PEtn,LipidA-OH          |
|             | 917.0                       | -                    | 2754.0                    | 2753.4     | 3Hex,4Hep,Kdo-P,2PEtn,LipidA-OH         |
|             | 930.0                       | -                    | 2793.0                    | 2792.5     | 4Hex,4Hep,Kdo-P,PEtn,LipidA-OH          |
|             | 971.5                       | -                    | 2917.5                    | 2915.5     | 4Hex,4Hep,Kdo-P,2PEtn,LipidA-OH         |
| PM18        | 930.0                       | -                    | 2793.0                    | 2792.5     | 4Hex,4Hep,Kdo-P,PEtn,LipidA-OH          |
|             | 970.9                       | -                    | 2915.7                    | 2915.5     | 4Hex,4Hep,Kdo-P,2PEtn,LipidA-OH         |
| PM48        | 984.0                       | -                    | 2955.0                    | 2954.6     | 5Hex,4Hep,Kdo-P,PEtn,LipidA-OH          |
|             | 1025.0                      | -                    | 3078.0                    | 3077.7     | 5Hex,4Hep,Kdo-P,2PEtn,LipidA-OH         |
|             | 1038.0                      | -                    | 3117.0                    | 3116.8     | 6Hex,4Hep,Kdo-P,PEtn,LipidA-OH          |
|             | 1079.0                      | -                    | 3240.0                    | 3239.8     | 6Hex,4Hep,Kdo-P,2PEtn,LipidA-OH         |
|             | 1106.0                      | -                    | 3321.0                    | 3320.0     | HexNAc,6Hex,4Hep,Kdo-P,PEtn,LipidA-OH   |
|             | 1146.5                      | -                    | 3442.5                    | 3443.0     | HexNAc,6Hex,4Hep,Kdo-P,2PEtn,LipidA-OH  |
| PM72        | 984.5                       | -                    | 2956.5                    | 2954.6     | 5Hex,4Hep,Kdo-P,PEtn,LipidA-OH          |
|             | 1025.5                      | -                    | 3079.5                    | 3077.7     | 5Hex,4Hep,Kdo-P,2PEtn,LipidA-OH         |
|             | 1038.0                      | -                    | 3117.0                    | 3116.8     | 6Hex,4Hep,Kdo-P,PEtn,LipidA-OH          |
|             | 1080.0                      | -                    | 3243.0                    | 3239.8     | 6Hex,4Hep,Kdo-P,2PEtn,LipidA-OH         |
|             | 1106.5                      | -                    | 3322.5                    | 3320.0     | HexNAc,6Hex,4Hep,Kdo-P,PEtn,LipidA-OH   |
|             | 1147.5                      | -                    | 3445.5                    | 3443.0     | HexNAc,6Hex,4Hep,Kdo-P,2PEtn,LipidA-OH  |
|             | 1174.0                      | -                    | 3525.0                    | 3523.2     | 2HexNAc,6Hex,4Hep,Kdo-P,PEtn,LipidA-OH  |
|             | 1215.0                      | -                    | 3648.0                    | 3646.2     | 2HexNAc,6Hex,4Hep,Kdo-P,2PEtn,LipidA-OH |
| PM146       | 930.0                       | -                    | 2793.0                    | 2792.5     | 4Hex,4Hep,Kdo-P,PEtn,LipidA-OH          |
|             | 971.0                       | -                    | 2916.0                    | 2915.5     | 4Hex,4Hep,Kdo-P,2PEtn,LipidA-OH         |
|             | 1011.5                      | -                    | 3037.5                    | 3038.6     | 4Hex,4Hep,Kdo-P,3PEtn,LipidA-OH         |
| PM1075      | -                           | 1075.5               | 2153.0                    | 2152.9     | 2Hex,3Hep,Kdo-P,LipidA-OH               |
|             | -                           | 1137.0               | 2276.0                    | 2276.0     | 2Hex,3Hep,Kdo-P,PEtn,LipidA-OH          |
|             | -                           | 1198.5               | 2399.0                    | 2399.0     | 2Hex,3Hep,Kdo-P,2PEtn,LipidA-OH         |
| PM1098      | 984.0                       | -                    | 2955.0                    | 2954.6     | 5Hex,4Hep,Kdo-P,PEtn,LipidA-OH          |

| Strain name | Observed Ions( $m/z$ ) |                      | Mol Mass(Da) <sup>a</sup> |            | Proposed Composition                    |
|-------------|------------------------|----------------------|---------------------------|------------|-----------------------------------------|
|             | (M-3H) <sup>3-</sup>   | (M-4H) <sup>4-</sup> | Observed                  | Calculated |                                         |
|             | 1025.0                 | -                    | 3078.0                    | 3077.7     | 5Hex,4Hep,Kdo-P,2PEtn,LipidA-OH         |
| PM1099      | 984.0                  | -                    | 2955.0                    | 2954.6     | 5Hex,4Hep,Kdo-P,PEtn,LipidA-OH          |
|             | 1025.0                 | -                    | 3078.0                    | 3077.7     | 5Hex,4Hep,Kdo-P,2PEtn,LipidA-OH         |
|             | 1038.0                 | -                    | 3117.0                    | 3116.8     | 6Hex,4Hep,Kdo-P,PEtn,LipidA-OH          |
|             | 1079.0                 | -                    | 3240.0                    | 3239.8     | 6Hex,4Hep,Kdo-P,2PEtn,LipidA-OH         |
|             | 1106.0                 | -                    | 3321.0                    | 3320.0     | HexNAc,6Hex,4Hep,Kdo-P,PEtn,LipidA-OH   |
|             | 1146.5                 | 860.0                | 3442.5                    | 3443.0     | HexNAc,6Hex,4Hep,Kdo-P,2PEtn,LipidA-OH  |
| PM1103      | 997.0                  | -                    | 2994.0                    | 2993.8     | 6Hex,4Hep,Kdo-P,LipidA-OH               |
|             | 1038.0                 | -                    | 3117.0                    | 3116.8     | 6Hex,4Hep,Kdo-P,PEtn,LipidA-OH          |
|             | 1065.0                 | -                    | 3198.0                    | 3197.0     | HexNAc,6Hex,4Hep,Kdo-P,LipidA-OH        |
|             | 1079.0                 | 809.5                | 3241.0                    | 3239.9     | 6Hex,4Hep,Kdo-P,2PEtn,LipidA-OH         |
|             | 1105.5                 | -                    | 3319.5                    | 3320.0     | HexNAc,6Hex,4Hep,Kdo-P,PEtn,LipidA-OH   |
|             | 1146.5                 | 860.0                | 3443.3                    | 3443.0     | HexNAc,6Hex,4Hep,Kdo-P,2PEtn,LipidA-OH  |
| PM1120      |                        | 1076.0               |                           | 2152.9     | 2Hex,3Hep,Kdo-P,LipidA-OH               |
|             |                        | 1138.0               |                           | 2276.0     | 2Hex,3Hep,Kdo-P,PEtn,LipidA-OH          |
|             |                        | 1199.5               |                           | 2399.0     | 2Hex,3Hep,Kdo-P,2PEtn,LipidA-OH         |
| PM1153      | 1025.0                 | -                    | 3078.0                    | 3077.7     | 5Hex,4Hep,Kdo-P,2PEtn,LipidA-OH         |
|             | 1079.0                 | 799.5                | 3240.0                    | 3239.8     | 6Hex,4Hep,Kdo-P,2PEtn,LipidA-OH         |
|             | 1120.5                 | 840.5                | 3364.5                    | 3362.9     | 6Hex,4Hep,Kdo-P,3PEtn,LipidA-OH         |
|             | 1188.5                 | -                    | 3568.5                    | 3566.1     | HexNAc,6Hex,4Hep,Kdo-P,3PEtn,LipidA-OH  |
|             | 1256.0                 | -                    | 3771.0                    | 3769.3     | 2HexNAc,6Hex,4Hep,Kdo-P,3PEtn,LipidA-OH |
| PM1205      | 984.0                  | -                    | 2955.0                    | 2954.6     | 5Hex,4Hep,Kdo-P,PEtn,LipidA-OH          |
|             | 1025.0                 | -                    | 3078.0                    | 3077.7     | 5Hex,4Hep,Kdo-P,2PEtn,LipidA-OH         |
|             | 1066.0                 | -                    | 3201.0                    | 3200.8     | 5Hex,4Hep,Kdo-P,3PEtn,LipidA-OH         |
| PM1258      |                        | 1076.0               |                           | 2152.9     | 2Hex,3Hep,Kdo-P,LipidA-OH               |
|             |                        | 1138.0               |                           | 2276.0     | 2Hex,3Hep,Kdo-P,PEtn,LipidA-OH          |
|             |                        | 1199.5               |                           | 2399.0     | 2Hex,3Hep,Kdo-P,2PEtn,LipidA-OH         |
| PM1268      | 971.0                  | -                    | 2916.0                    | 2915.5     | 4Hex,4Hep,Kdo-P,2PEtn,LipidA-OH         |
|             | 1025.0                 | -                    | 3078.0                    | 3077.7     | 5Hex,4Hep,Kdo-P,2PEtn,LipidA-OH         |
|             | 1066.0                 | -                    | 3201.5                    | 3200.8     | 5Hex,4Hep,Kdo-P,3PEtn,LipidA-OH         |
| PM1320      | 971.0                  | -                    | 2916.0                    | 2915.5     | 4Hex,4Hep,Kdo-P,2PEtn,LipidA-OH         |
|             | 983.5                  | -                    | 2953.5                    | 2954.6     | 5Hex,4Hep,Kdo-P,PEtn,LipidA-OH          |
|             | 1012.0                 | -                    | 3039.0                    | 3038.5     | 4Hex,4Hep,Kdo-P,3PEtn,LipidA-OH         |
|             | 1025.0                 | -                    | 3078.0                    | 3077.7     | 5Hex,4Hep,Kdo-P,2PEtn,LipidA-OH         |
|             | 1066.0                 | 799.5                | 3201.5                    | 3200.8     | 5Hex,4Hep,Kdo-P,3PEtn,LipidA-OH         |
| PM1369      | 984.0                  | -                    | 2955.0                    | 2954.6     | 5Hex,4Hep,Kdo-P,PEtn,LipidA-OH          |
|             | 1025.0                 | -                    | 3078.0                    | 3077.7     | 5Hex,4Hep,Kdo-P,2PEtn,LipidA-OH         |
|             | 1038.0                 | -                    | 3117.0                    | 3116.8     | 6Hex,4Hep,Kdo-P,PEtn,LipidA-OH          |
|             | 1079.0                 | -                    | 3241.0                    | 3239.9     | 6Hex,4Hep,Kdo-P,2PEtn,LipidA-OH         |
| PM1434      | 1106.0                 | 829.0                | 3320.5                    | 3320.0     | HexNAc,6Hex,4Hep,Kdo-P,PEtn,LipidA-OH   |
|             | 1147.0                 | 860.0                | 3444.0                    | 3443.0     | HexNAc,6Hex,4Hep,Kdo-P,2PEtn,LipidA-OH  |
| PM1439      | 1025.5                 | -                    |                           | 3077.7     | 5Hex,4Hep,Kdo-P,2PEtn,LipidA-OH         |

| Strain name | Observed Ions( $m/z$ ) |                      | Mol Mass(Da) <sup>a</sup> |            | Proposed Composition                    |
|-------------|------------------------|----------------------|---------------------------|------------|-----------------------------------------|
|             | (M-3H) <sup>3-</sup>   | (M-4H) <sup>4-</sup> | Observed                  | Calculated |                                         |
|             | 1066.5                 | 800.5                |                           | 3200.8     | 5Hex,4Hep,Kdo-P,3PEtn,LipidA-OH         |
|             | 1107.5                 |                      |                           |            | 5Hex,4Hep,Kdo-P,4PEtn,LipidA-OH         |
| PM1441      | 984.0                  | -                    | 2955.0                    | 2954.6     | 5Hex,4Hep,Kdo-P,PEtn,LipidA-OH          |
|             | 1025.0                 | -                    | 3078.0                    | 3077.7     | 5Hex,4Hep,Kdo-P,2PEtn,LipidA-OH         |
|             | 1038.0                 |                      | 3117.0                    | 3116.8     | 6Hex,4Hep,Kdo-P,PEtn,LipidA-OH          |
|             | 1079.0                 |                      | 3240.0                    | 3239.8     | 6Hex,4Hep,Kdo-P,2PEtn,LipidA-OH         |
|             | 1106.0                 |                      | 3321.0                    | 3320.0     | HexNAc,6Hex,4Hep,Kdo-P,PEtn,LipidA-OH   |
|             | 1146.5                 | 860.0                | 3442.5                    | 3443.0     | HexNAc,6Hex,4Hep,Kdo-P,2PEtn,LipidA-OH  |
| PM1470      | 1105.5                 | 829.0                | 3319.5                    | 3320.0     | HexNAc,6Hex,4Hep,Kdo-P,PEtn,LipidA-OH   |
|             | 1146.5                 | 860.0                | 3443.8                    | 3443.0     | HexNAc,6Hex,4Hep,Kdo-P,2PEtn,LipidA-OH  |
|             | 1173.5                 | 879.5                | 3522.7                    | 3523.2     | 2HexNAc,6Hex,4Hep,Kdo-P,PEtn,LipidA-OH  |
|             |                        | 910.5                | 3646.0                    | 3646.2     | 2HexNAc,6Hex,4Hep,Kdo-P,2PEtn,LipidA-OH |
| PM1474      | 984.0                  | -                    | 2955.0                    | 2954.6     | 5Hex,4Hep,Kdo-P,PEtn,LipidA-OH          |
|             | 1025.0                 | -                    | 3078.0                    | 3077.7     | 5Hex,4Hep,Kdo-P,2PEtn,LipidA-OH         |
|             | 1038.0                 | -                    | 3117.0                    | 3116.8     | 6Hex,4Hep,Kdo-P,PEtn,LipidA-OH          |
|             | 1079.0                 | -                    | 3241.0                    | 3239.9     | 6Hex,4Hep,Kdo-P,2PEtn,LipidA-OH         |

<sup>a</sup> Average mass units were used for calculation of molecular weight based on proposed composition as follows: Lipid A-OH, 952.00; Hex, 162.15; Hep, 192.17; Kdo, 220.18; PEtn, 123.05; P,79.95. All data obtained from Precursor ion scanning for  $m/z$ 951<sup>-</sup>.
